# Supplementary material for: DeepRTAlign: toward accurate retention time alignment for large cohort mass spectrometry data analysis
Source: PubMed Central journal article supplement (PMC10713976; doi:10.1038/s41467-023-43909-5), 2023-12-11
Supplement: 41467_2023_43909_MOESM1_ESM.pdf [file 41467_2023_43909_MOESM1_ESM.pdf]

# Supplementary Information of

## DeepRTAlign: toward accurate retention time alignment for large cohort mass spectrometry data analysis

Yi Liu<sup>1,2,#</sup>, Yun Yang<sup>3,4,#</sup>, Wendong Chen<sup>3,4</sup>, Feng Shen<sup>5</sup>, Linhai Xie<sup>2,3,4</sup>, Yingying Zhang<sup>2,6</sup>, Yuanjun Zhai<sup>2</sup>, Fuchu He<sup>2,7</sup>, Yunping Zhu<sup>2,\*</sup>, Cheng Chang<sup>2,7,\*</sup>

1. Faculty of Environment and Life, Beijing University of Technology, Beijing 100023, China.
2. State Key Laboratory of Proteomics, Beijing Proteome Research Center, National Center for Protein Sciences (Beijing), Beijing Institute of Lifeomics, Beijing 102206, China.
3. International Academy of Phronesis Medicine (Guang Dong), No. 96 Xindao Ring South Road, Guangzhou International Bio Island, Guangzhou 510000, China
4. South China Institute of Biomedicine, No. 83 Ruihe Road, Guangzhou 510535, China
5. Department of Hepatic Surgery IV, the Eastern Hepatobiliary Surgery Hospital, Naval Medical University, Shanghai 200433, China
6. Chongqing Key Laboratory on Big Data for Bio Intelligence, Chongqing University of Posts and Telecommunications, Chongqing 400065, China
7. Research Unit of Proteomics Driven Cancer Precision Medicine, Chinese Academy of Medical Sciences, Beijing 102206, China.

<sup>#</sup>These authors contributed equally: Yi Liu and Yun Yang

\* To whom correspondence should be addressed:

Yunping Zhu, Email: [zhuyunping@gmail.com](mailto:zhuyunping@gmail.com)

Cheng Chang, Email: [changchengbio@163.com](mailto:changchengbio@163.com)

## TOC

|                             |   |
|-----------------------------|---|
| Supplementary Tables .....  | 3 |
| Supplementary Figures ..... | 8 |

## Supplementary Tables

**Supplementary Table 1.** The datasets used for training and testing the deep learning model of DeepRTAlign in this study. The sample numbers in this table were the number of samples used in this work. HCC-T and HCC-N indicated the data from tumor and non-tumor samples of an HCC cohort (N=101). HCC-R and HCC-R2 were data from two HCC cohorts. UPS2-M and UPS2-Y were two benchmark datasets from mouse cells and yeast cells with UPS2 proteins spiked in. EC-H was a dataset from the mixture of human cells and E. coli cells. AT was a dataset based on the *Arabidopsis thaliana* seeds. SC was a single-cell proteomic dataset. MI was based on mouse intestinal samples. CD was obtained from the gut microbiota of patients with Crohn's disease. NCC19, SM1100, MM, SO and GUS were public metabolomic datasets. Benchmark-QC-H and Benchmark-QC-E were two benchmark datasets based on HEK 293T and E. coli samples, respectively. Benchmark-FC was a benchmark dataset with known fold changes. Benchmark-RT contained two HEK 293T samples with different RT gradients (60 min and 120 min). Benchmark-MV was a benchmark dataset containing different proportions of HEK 293T and E. coli samples from six Orbitrap Exploris 480 instruments.

| Dataset name   | Sample numbers | Dataset ID    | RT range (min) | Type                                  |
|----------------|----------------|---------------|----------------|---------------------------------------|
| HCC-T          | 101            | PXD006512     | 80             | Training set                          |
| HCC-N          | 101            | PXD006512     | 80             | Proteomic test set                    |
| HCC-R          | 11             | PXD022881     | 60             | Proteomic test set                    |
| UPS2-M         | 12             | PXD008428     | 100            | Proteomic test set                    |
| UPS2-Y         | 12             | PXD008428     | 100            | Proteomic test set                    |
| EC-H           | 20             | PXD003881     | 170            | Proteomic test set                    |
| AT             | 18             | PXD027546     | 130            | Proteomic test set                    |
| SC             | 18             | PXD025634     | 90             | Proteomic test set                    |
| MI             | 1              | PXD002838     | 180            | Proteomic test set                    |
| CD             | 1              | PXD002882     | 120            | Proteomic test set                    |
| NCC19          | 1              | MTBLS1866     | 30             | Metabolomic test set                  |
| SM1100         | 10             | MTBLS733      | 50             | Metabolomic test set                  |
| MM             | 1              | MTBLS5430     | 40             | Metabolomic test set                  |
| SO             | 1              | MTBLS492      | 45             | Metabolomic test set                  |
| GUS            | 1              | MTBLS650      | 40             | Metabolomic test set                  |
| HCC-R2         | 23             | IPX0006622000 | 180            | PRM validation                        |
| Benchmark-FC   | 12             | IPX0006638000 | 60             | Benchmark (known fold changes)        |
| Benchmark-QC-H | 3              | IPX0006819000 | 60             | Benchmark for QC                      |
| Benchmark-QC-E | 3              | IPX0006819000 | 60             | Benchmark for QC                      |
| Benchmark-RT   | 2              | IPX0006820000 | 60 and 120     | Alignment for different gradients     |
| Benchmark-MV   | 24             | IPX0007319000 | 60             | Benchmark for reducing missing values |

**Supplementary Table 2.** Parameters optimization for the DNN model in DeepRTAlign based on the 10-fold cross validation results of the training set HCC-T.

(a) Optimization for hidden layer number in the DNN model. In this test, each layer has 5000 neurons.

| Hidden layer number | 1           | 2           | 3                  | 4           | 5           |
|---------------------|-------------|-------------|--------------------|-------------|-------------|
| AUC                 | 0.988±0.003 | 0.990±0.002 | <b>0.993±0.002</b> | 0.992±0.003 | 0.993±0.002 |

(b) Optimization for neuron number in the DNN model. All the models have 3 hidden layers.

| Neuron number | 50          | 500         | 5000               | 50000       | 500000      |
|---------------|-------------|-------------|--------------------|-------------|-------------|
| AUC           | 0.887±0.012 | 0.969±0.011 | <b>0.993±0.002</b> | 0.993±0.001 | 0.992±0.001 |

**Supplementary Table 3.** The AUCs on different test sets. All the results are based on the model trained on the HCC-T dataset. In each test set, we randomly selected 10,000 positive and 10,000 negative feature pairs to perform this evaluation.

| Dataset | DNN          | RF    | KNN   | SVM   | LR    |
|---------|--------------|-------|-------|-------|-------|
| HCC-N   | <b>0.925</b> | 0.916 | 0.656 | 0.865 | 0.894 |
| HCC-R   | <b>0.933</b> | 0.905 | 0.668 | 0.901 | 0.899 |
| UPS2-M  | <b>0.979</b> | 0.919 | 0.683 | 0.896 | 0.905 |
| UPS2-Y  | <b>0.971</b> | 0.920 | 0.702 | 0.900 | 0.897 |
| EC-H    | <b>0.972</b> | 0.938 | 0.733 | 0.912 | 0.944 |
| AT      | <b>0.975</b> | 0.943 | 0.785 | 0.932 | 0.945 |
| SC      | <b>0.917</b> | 0.901 | 0.752 | 0.842 | 0.898 |

**Supplementary Table 4.** The AUCs of DeepRTAlign when using different samples in the test sets as the anchor sample. All the results are based on the model trained on the HCC-T dataset. In each test set, five samples are randomly selected.

| Dataset | Sample 1 | Sample 2 | Sample 3 | Sample 4 | Sample 5 |
|---------|----------|----------|----------|----------|----------|
| HCC-N   | 0.925    | 0.926    | 0.925    | 0.926    | 0.924    |
| HCC-R   | 0.933    | 0.930    | 0.930    | 0.933    | 0.934    |
| UPS2-M  | 0.979    | 0.977    | 0.976    | 0.976    | 0.981    |
| UPS2-Y  | 0.971    | 0.972    | 0.973    | 0.971    | 0.971    |
| EC-H    | 0.972    | 0.971    | 0.972    | 0.972    | 0.972    |
| AT      | 0.975    | 0.975    | 0.974    | 0.976    | 0.975    |
| SC      | 0.917    | 0.909    | 0.915    | 0.919    | 0.918    |

**Supplementary Table 5.** The AUCs of DeepRTAlign with or without coarse alignment step in different test sets. All the results are based on the model trained on HCC-T dataset. And in this table, all the models have 3 hidden layers, and each layer has 5000 neurons.

| Dataset | With coarse alignment | Without coarse alignment |
|---------|-----------------------|--------------------------|
| HCC-N   | <b>0.925</b>          | 0.899                    |
| HCC-R   | <b>0.933</b>          | 0.875                    |
| UPS2-M  | <b>0.979</b>          | 0.909                    |
| UPS2-Y  | <b>0.971</b>          | 0.898                    |
| EC-H    | <b>0.972</b>          | 0.905                    |
| AT      | <b>0.975</b>          | 0.917                    |
| SC      | <b>0.917</b>          | 0.821                    |

**Supplementary Table 6.** The list of feature importance of the DNN model, the RF model and the LR model. The DNN model, the RF model and the LR model were trained on the same training set (HCC-T dataset). Please note that the feature importance of LR model is ranked by the absolute value of “coef”.

| DNN   |            |                                    | RF    |            |                                    | LR    |            |                                    |
|-------|------------|------------------------------------|-------|------------|------------------------------------|-------|------------|------------------------------------|
| index | importance | Features                           | index | importance | Features                           | index | importance | Features                           |
| 16    | 0.107      | mZ <sub>m</sub> -mZ <sub>n</sub>   | 16    | 0.205      | mZ <sub>m</sub> -mZ <sub>n</sub>   | 16    | 8.804      | mZ <sub>m</sub> -mZ <sub>n</sub>   |
| 6     | 0.107      | mZ <sub>n</sub> -mZ <sub>m</sub>   | 6     | 0.199      | mZ <sub>n</sub> -mZ <sub>m</sub>   | 6     | 8.803      | mZ <sub>n</sub> -mZ <sub>m</sub>   |
| 5     | 0.048      | RT <sub>n</sub> -RT <sub>m</sub>   | 5     | 0.065      | RT <sub>n</sub> -RT <sub>m</sub>   | 27    | -2.435     | RT <sub>n+1</sub>                  |
| 15    | 0.048      | RT <sub>m</sub> -RT <sub>n</sub>   | 15    | 0.058      | RT <sub>m</sub> -RT <sub>n</sub>   | 21    | -2.294     | RT <sub>n-2</sub>                  |
| 11    | 0.026      | RT <sub>m-2</sub> -RT <sub>n</sub> | 11    | 0.030      | RT <sub>m-2</sub> -RT <sub>n</sub> | 25    | 1.129      | RT <sub>n</sub>                    |
| 13    | 0.024      | RT <sub>m-1</sub> -RT <sub>n</sub> | 35    | 0.025      | RT <sub>m</sub>                    | 37    | 0.928      | RT <sub>m+1</sub>                  |
| 1     | 0.023      | RT <sub>n-2</sub> -RT <sub>m</sub> | 25    | 0.023      | RT <sub>n</sub>                    | 29    | 0.854      | RT <sub>n+2</sub>                  |
| 17    | 0.017      | RT <sub>m+1</sub> -RT <sub>n</sub> | 13    | 0.018      | RT <sub>m-1</sub> -RT <sub>n</sub> | 31    | 0.679      | RT <sub>m-2</sub>                  |
| 10    | 0.010      | mZ <sub>n+2</sub> -mZ <sub>m</sub> | 19    | 0.017      | RT <sub>m+2</sub> -RT <sub>n</sub> | 23    | 0.415      | RT <sub>n-1</sub>                  |
| 4     | 0.010      | mZ <sub>n-1</sub> -mZ <sub>m</sub> | 17    | 0.016      | RT <sub>m+1</sub> -RT <sub>n</sub> | 35    | 0.397      | RT <sub>m</sub>                    |
| 31    | 0.006      | RT <sub>m-2</sub>                  | 37    | 0.016      | RT <sub>m+1</sub>                  | 17    | 0.234      | RT <sub>m+1</sub> -RT <sub>n</sub> |
| 21    | 0.006      | RT <sub>n-2</sub>                  | 27    | 0.015      | RT <sub>n+1</sub>                  | 32    | -0.216     | mZ <sub>m-2</sub>                  |
| 8     | 0.005      | mZ <sub>n+1</sub> -mZ <sub>m</sub> | 39    | 0.015      | RT <sub>m+2</sub>                  | 30    | -0.216     | mZ <sub>n+2</sub>                  |
| 14    | 0.005      | mZ <sub>m-1</sub> -mZ <sub>n</sub> | 7     | 0.014      | RT <sub>n+1</sub> -RT <sub>m</sub> | 34    | -0.216     | mZ <sub>m-1</sub>                  |
| 9     | 0.004      | RT <sub>n+2</sub> -RT <sub>m</sub> | 9     | 0.013      | RT <sub>n+2</sub> -RT <sub>m</sub> | 38    | -0.216     | mZ <sub>m+1</sub>                  |
| 3     | 0.002      | RT <sub>n-1</sub> -RT <sub>m</sub> | 36    | 0.013      | mZ <sub>m</sub>                    | 24    | -0.216     | mZ <sub>n-1</sub>                  |
| 7     | 0.002      | RT <sub>n+1</sub> -RT <sub>m</sub> | 23    | 0.013      | RT <sub>n-1</sub>                  | 40    | -0.216     | mZ <sub>m+2</sub>                  |
| 18    | 0.002      | mZ <sub>m+1</sub> -mZ <sub>n</sub> | 12    | 0.012      | mZ <sub>m-2</sub> -mZ <sub>n</sub> | 36    | -0.216     | mZ <sub>m</sub>                    |
| 34    | 0.002      | mZ <sub>m-1</sub>                  | 1     | 0.012      | RT <sub>n-2</sub> -RT <sub>m</sub> | 26    | -0.216     | mZ <sub>n</sub>                    |
| 20    | 0.001      | mZ <sub>m+2</sub> -mZ <sub>n</sub> | 14    | 0.012      | mZ <sub>m-1</sub> -mZ <sub>n</sub> | 22    | -0.216     | mZ <sub>n-2</sub>                  |
| 36    | 0.001      | mZ <sub>m</sub>                    | 3     | 0.012      | RT <sub>n-1</sub> -RT <sub>m</sub> | 28    | -0.216     | mZ <sub>n+1</sub>                  |
| 22    | 0.001      | mZ <sub>n-2</sub>                  | 10    | 0.012      | mZ <sub>n+2</sub> -mZ <sub>m</sub> | 18    | -0.210     | mZ <sub>m+1</sub> -mZ <sub>n</sub> |
| 33    | 0.001      | RT <sub>m-1</sub>                  | 32    | 0.012      | mZ <sub>m-2</sub>                  | 4     | -0.185     | mZ <sub>n-1</sub> -mZ <sub>m</sub> |

|    |       |                                    |    |       |                                    |    |        |                                    |
|----|-------|------------------------------------|----|-------|------------------------------------|----|--------|------------------------------------|
| 38 | 0.001 | mZ <sub>m+1</sub>                  | 34 | 0.012 | mZ <sub>m-1</sub>                  | 11 | -0.163 | RT <sub>m-2</sub> -RT <sub>n</sub> |
| 19 | 0.001 | RT <sub>m+2</sub> -RT <sub>n</sub> | 21 | 0.011 | RT <sub>n-2</sub>                  | 19 | -0.141 | RT <sub>m+2</sub> -RT <sub>n</sub> |
| 28 | 0.001 | mZ <sub>n+1</sub>                  | 38 | 0.011 | mZ <sub>m+1</sub>                  | 33 | -0.101 | RT <sub>m-1</sub>                  |
| 40 | 0.001 | mZ <sub>m+2</sub>                  | 18 | 0.011 | mZ <sub>m+1</sub> -mZ <sub>n</sub> | 20 | 0.080  | mZ <sub>m+2</sub> -mZ <sub>n</sub> |
| 26 | 0.001 | mZ <sub>n</sub>                    | 22 | 0.011 | mZ <sub>n-2</sub>                  | 7  | -0.080 | RT <sub>n+1</sub> -RT <sub>m</sub> |
| 30 | 0.000 | mZ <sub>n+2</sub>                  | 29 | 0.011 | RT <sub>n+2</sub>                  | 8  | -0.074 | mZ <sub>n+1</sub> -mZ <sub>m</sub> |
| 32 | 0.000 | mZ <sub>m-2</sub>                  | 30 | 0.010 | mZ <sub>n+2</sub>                  | 14 | -0.073 | mZ <sub>m-1</sub> -mZ <sub>n</sub> |
| 25 | 0.000 | RT <sub>n</sub>                    | 2  | 0.010 | mZ <sub>n-2</sub> -mZ <sub>m</sub> | 5  | 0.063  | RT <sub>n</sub> -RT <sub>m</sub>   |
| 23 | 0.000 | RT <sub>n-1</sub>                  | 33 | 0.010 | RT <sub>m-1</sub>                  | 15 | 0.063  | RT <sub>m</sub> -RT <sub>n</sub>   |
| 24 | 0.000 | mZ <sub>n-1</sub>                  | 20 | 0.010 | mZ <sub>m+2</sub> -mZ <sub>n</sub> | 39 | 0.058  | RT <sub>m+2</sub>                  |
| 2  | 0.000 | mZ <sub>n-2</sub> -mZ <sub>m</sub> | 8  | 0.010 | mZ <sub>n+1</sub> -mZ <sub>m</sub> | 9  | -0.045 | RT <sub>n+2</sub> -RT <sub>m</sub> |
| 12 | 0.000 | mZ <sub>m-2</sub> -mZ <sub>n</sub> | 40 | 0.010 | mZ <sub>m+2</sub>                  | 2  | -0.040 | mZ <sub>n-2</sub> -mZ <sub>m</sub> |
| 27 | 0.000 | RT <sub>n+1</sub>                  | 24 | 0.010 | mZ <sub>n-1</sub>                  | 1  | 0.036  | RT <sub>n-2</sub> -RT <sub>m</sub> |
| 29 | 0.000 | RT <sub>n+2</sub>                  | 26 | 0.009 | mZ <sub>n</sub>                    | 13 | 0.036  | RT <sub>m-1</sub> -RT <sub>n</sub> |
| 35 | 0.000 | RT <sub>m</sub>                    | 28 | 0.009 | mZ <sub>n+1</sub>                  | 10 | -0.026 | mZ <sub>m+2</sub> -mZ <sub>m</sub> |
| 37 | 0.000 | RT <sub>m+1</sub>                  | 31 | 0.009 | RT <sub>m-2</sub>                  | 12 | -0.023 | mZ <sub>m-2</sub> -mZ <sub>n</sub> |
| 39 | 0.000 | RT <sub>m+2</sub>                  | 4  | 0.009 | mZ <sub>n-1</sub> -mZ <sub>m</sub> | 3  | 0.010  | RT <sub>n-1</sub> -RT <sub>m</sub> |

**Supplementary Table 7.** The minimum information required for alignment in each tool. Symbol “√” represents for required and “-” represents for “not required”.

| Tools       | MS | MS/MS | Identification results |
|-------------|----|-------|------------------------|
| DeepRTAlign | √  | -     | -                      |
| MZmine 2    | √  | -     | -                      |
| OpenMS      | √  | -     | -                      |
| Quandenser  | √  | √     | -                      |
| MaxQuant    | √  | √     | √                      |
| MSFragger   | √  | √     | √                      |
| DIA-NN      | √  | √     | √                      |

**Supplementary Table 8.** The different algorithm combinations for benchmarking DeepRTAlign against MZmine 2 and OpenMS on a public metabolomic test set SM1100.

| Abbreviations | Feature extraction | Feature alignment | Precision | Recall |
|---------------|--------------------|-------------------|-----------|--------|
| MM            | MZmine 2           | MZmine 2          | 1.000     | 1.000  |
| MD            | MZmine 2           | DeepRTAlign       | 1.000     | 1.000  |
| OO            | OpenMS             | OpenMS            | 1.000     | 0.980  |
| OD            | OpenMS             | DeepRTAlign       | 0.997     | 0.985  |
| DD            | Dinosaur           | DeepRTAlign       | 0.971     | 0.965  |

**Supplementary Table 9.** Parameters optimization for K in the KNN model based on the 10-fold cross validation results of the training set HCC-T. All the other parameters were kept default in scikit-learn v0.21.3.

| K   | 1           | 2           | 3           | 4           | 5                  | 6           |
|-----|-------------|-------------|-------------|-------------|--------------------|-------------|
| AUC | 0.807±0.080 | 0.836±0.085 | 0.850±0.083 | 0.853±0.083 | <b>0.853±0.081</b> | 0.852±0.077 |

**Supplementary Table 10.** Parameters optimization in the LR model based on the 10-fold cross validation results of the training set HCC-T. All the other parameters were kept default in scikit-learn v0.21.3.

(a) Optimization for solver in the LR model. All the other parameters were kept default in scikit-learn v0.21.3.

| solver | lbfgs              | liblinear   | newton-cg   | sag         | saga        |
|--------|--------------------|-------------|-------------|-------------|-------------|
| AUC    | <b>0.912±0.018</b> | 0.911±0.017 | 0.911±0.017 | 0.911±0.017 | 0.911±0.017 |

(b) Optimization for penalty in the LR model. The solver was set to “lbfgs”. All the other parameters were kept default in scikit-learn v0.21.3.

| penalty | L2                 | None        |
|---------|--------------------|-------------|
| AUC     | <b>0.911±0.017</b> | 0.911±0.017 |

## Supplementary Figures

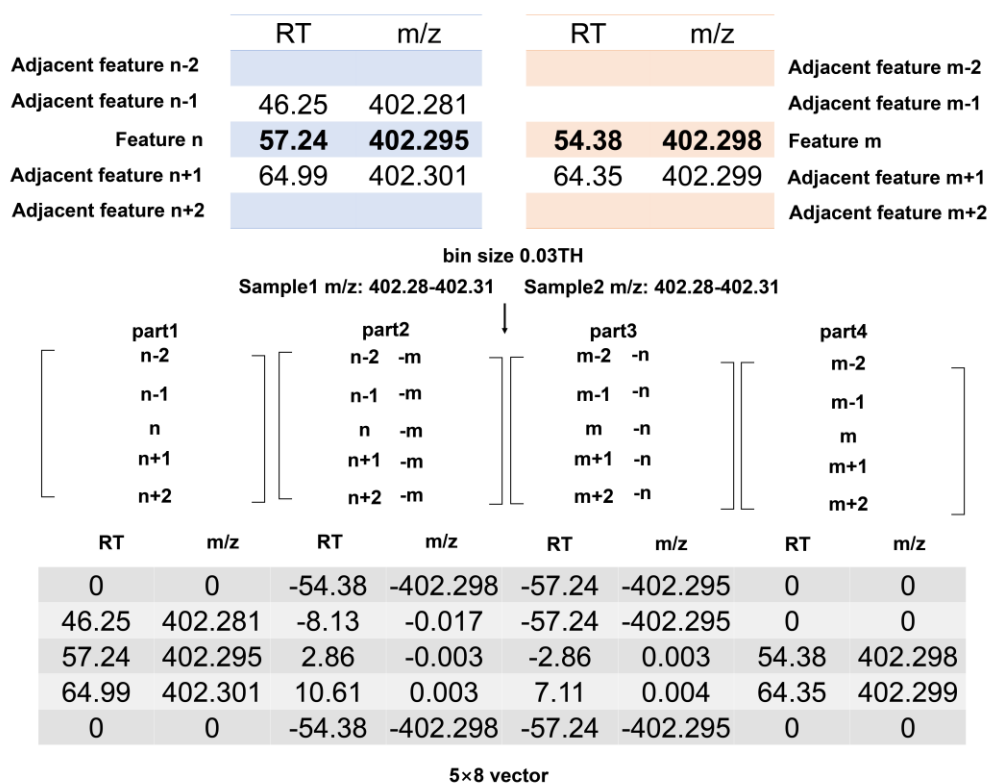

**Supplementary Fig. 1. An input example for DeepRTAlign.** After min-max normalization on each column, this 5×8 vector is used as the input to the neural network. If feature n and feature m are the same peptide, this vector will be labeled as “aligned” (should be aligned), otherwise it will be labeled as “non-aligned” (should not be aligned).



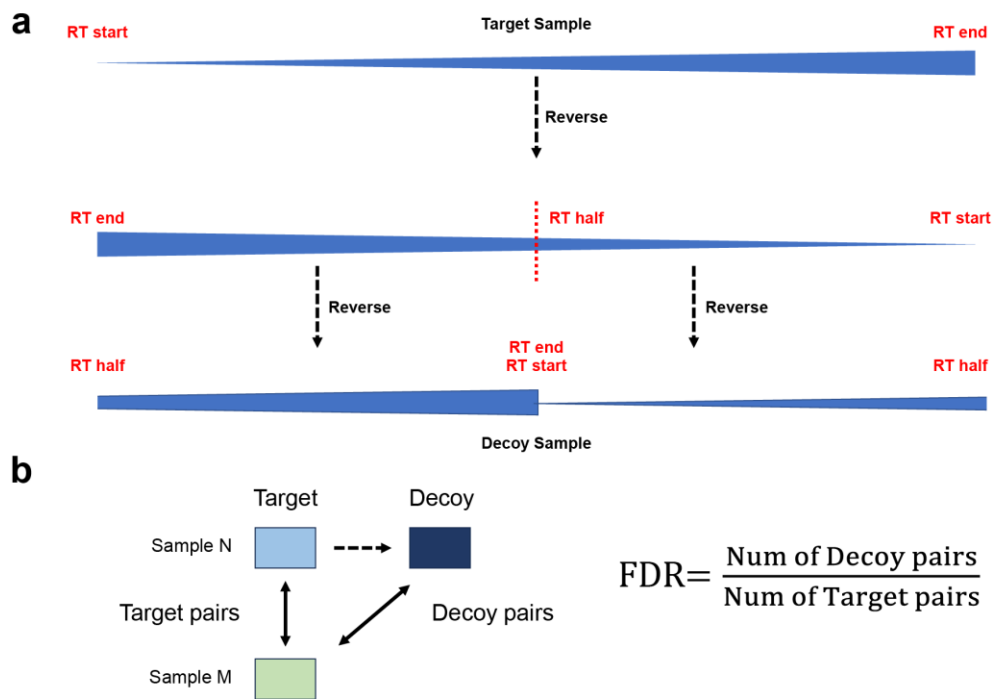

**Supplementary Fig. 2. Illustration of the QC module in DeepRTAlign. a** The decoy design workflow. **b** The FDR calculation workflow.

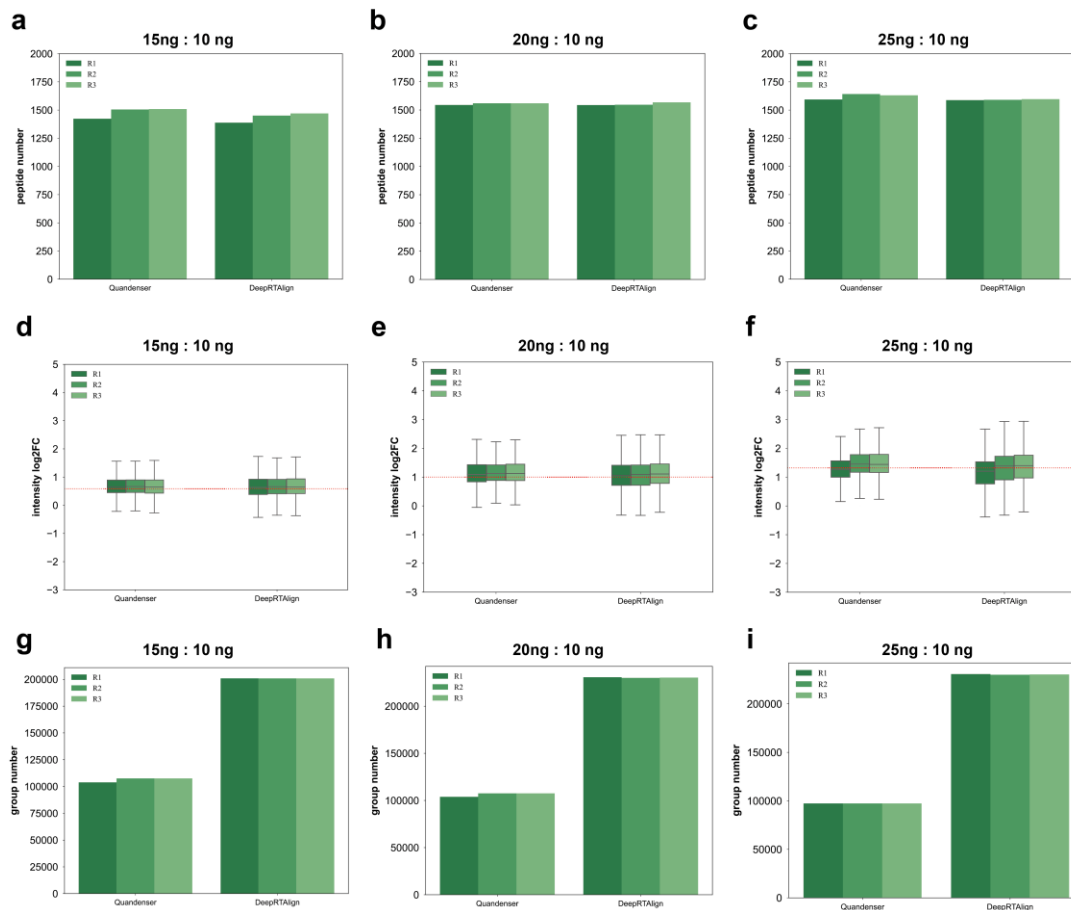

**Supplementary Fig. 3. Comparison of DeepRTAlign and Quandenser on Benchmark-FC dataset.** The number and ratio distributions of all *E. coli* peptides and the group number of aligned features between specific samples (a, d, g: 15ng/10ng, b, e, h: 20ng/10ng, and c, f, i: 25ng/10ng) in each replicate (R1, R2 and R3) after alignment by Quandenser and DeepRTAlign. It should be noted that a group is defined as a set of aligned features in different runs. Source data are provided as a Source Data file.

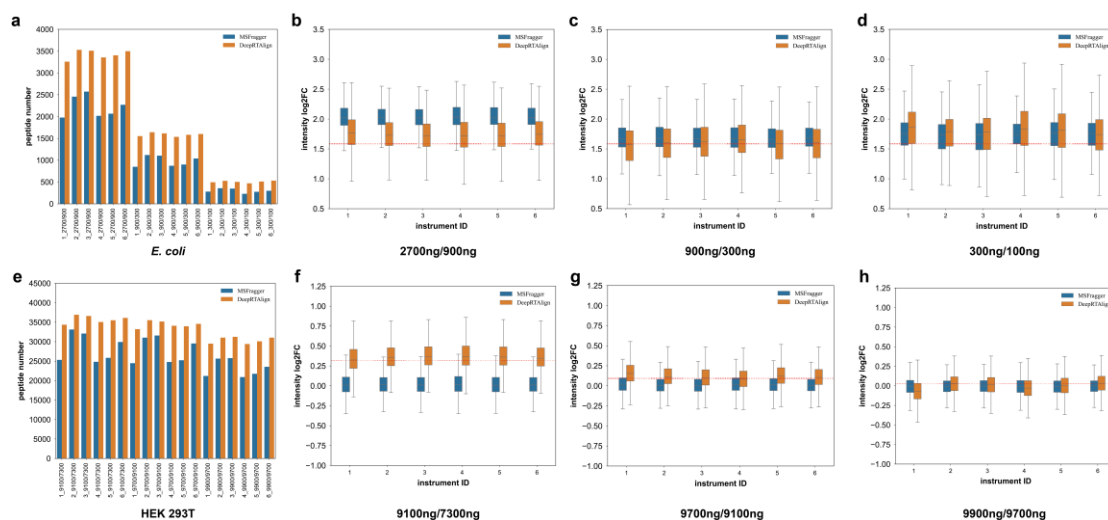

**Supplementary Fig. 4. Comparison of DeepRTAlign and MSFragger on Benchmark-MV dataset.** a, e Feature numbers corresponding to the *E. coli* peptides and the HEK 293T peptides

identified in dataset Benchmark-MV by MSFragger with match between runs (MBR) and DeepRTAlign, respectively. **b-d** and **f-h** Ratio boxplots for the features corresponding to the *E. coli* peptides or the HEK 293T peptides identified in dataset Benchmark-MV by MSFragger with MBR and DeepRTAlign, respectively. The orange dashed line indicates the theoretical ratio. For DeepRTAlign results, features were extracted by Dinosaur, and then aligned by DeepRTAlign. MSFragger's identification results were used to match these features (mass tolerance:  $\pm 10$  ppm, RT tolerance: restrict the RT of a peptide to be within the RT range of the corresponding precursor feature). Source data are provided as a Source Data file.

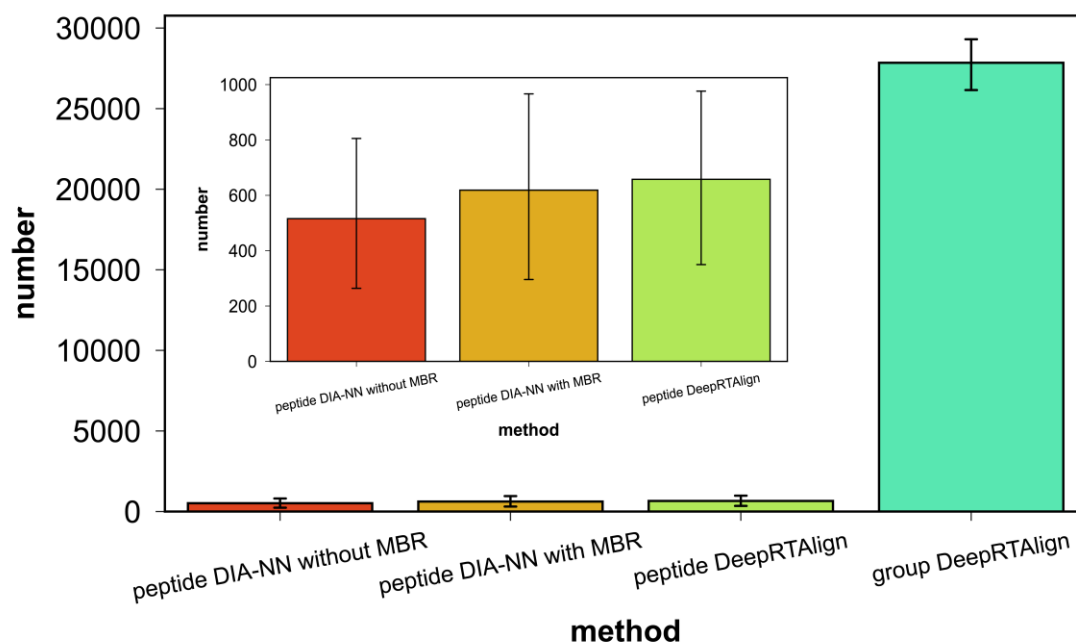

**Supplementary Fig. 5. The peptide number and feature number of each HT22 cell.** Features are extracted by Dinosaur. Only the features presented in at least two cells are considered. MBR: match between runs. Error bar indicates standard deviation. It should be noted that a group is defined as a set of aligned features in different runs. Source data are provided as a Source Data file.

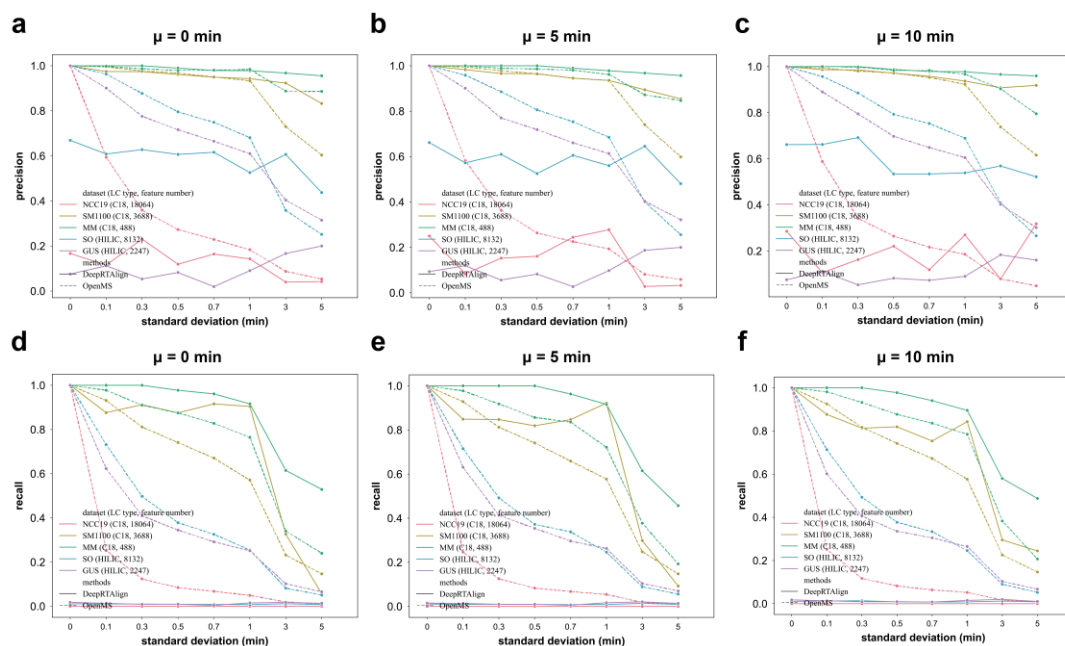

**Supplementary Fig. 6. Comparison of DeepRTAlign and OpenMS on multiple simulated datasets generated from 5 real-world metabolomic datasets.** The simulated datasets were constructed by adding normally distributed RT shifts to the corresponding real-world dataset. (a, d)  $\mu=0$  min. (b, e)  $\mu=5$  min. (c, f)  $\mu=10$  min. The normal distribution has an increasing  $\sigma$ , i.e.,  $\sigma=0, 0.1, 0.3, 0.5, 0.7, 1, 3, 5$  for different  $\mu$  (0, 5 and 10 minutes), respectively. The FDR of DeepRTAlign's results is set to 1%. Source data are provided as a Source Data file.

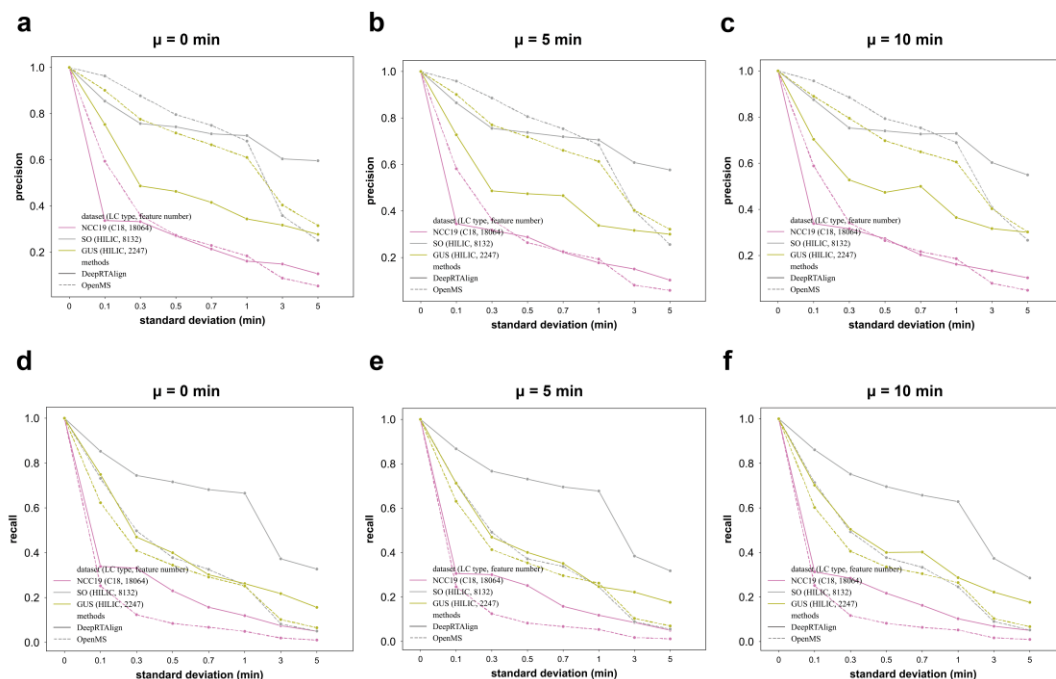

**Supplementary Fig. 7. Comparison of DeepRTAlign and OpenMS on multiple simulated datasets generated from 3 real-world metabolomic datasets.** The simulated datasets were constructed by adding normally distributed RT shifts to the corresponding real-world dataset. (a, d)  $\mu=0$  min. (b, e)  $\mu=5$  min. (c, f)  $\mu=10$  min. The normal distribution has an increasing  $\sigma$ , i.e.,  $\sigma=0, 0.1,$

0.3, 0.5, 0.7, 1, 3, 5 for different  $\mu$  (0, 5 and 10 minutes), respectively. The FDR of DeepRTAlign's results is set to 100%. Source data are provided as a Source Data file.

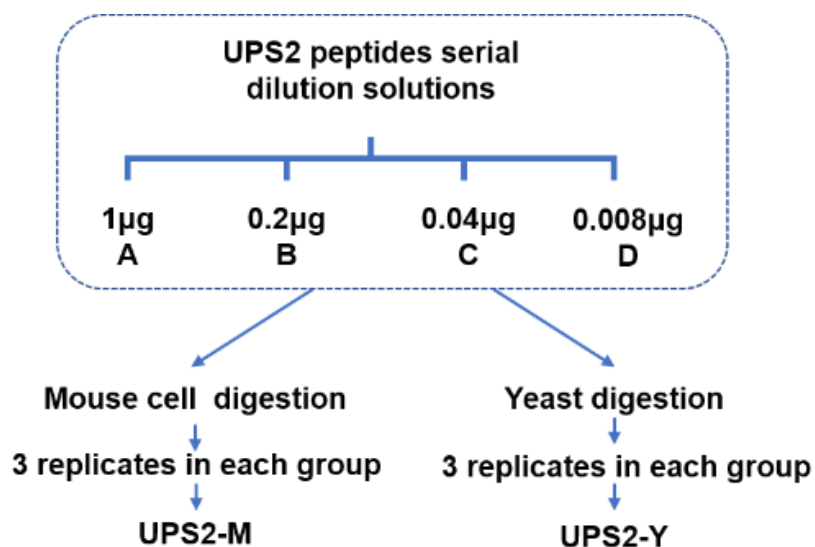

**Supplementary Fig. 8. Experimental design of UPS2-Y and UPS2-M data sets.** A series of UPS2 protein digestions (1, 0.2, 0.04, and 0.008  $\mu\text{g}$ , represented as A, B, C, and D in this study) was added into an equal amount of mouse cell and yeast mixtures to build the UPS2-M and UPS2-Y datasets. This figure was modified from our previous paper (Chang et al. Anal Chem 2016, 88 (13), 6844–6851).
